# Supplementary material
Source: PubMed Central journal article supplement (PMC2804368)
Supplement: supp_M109.065813_jbc.M109.065813-1.pdf [file supp_M109.065813_jbc.M109.065813-1.pdf]

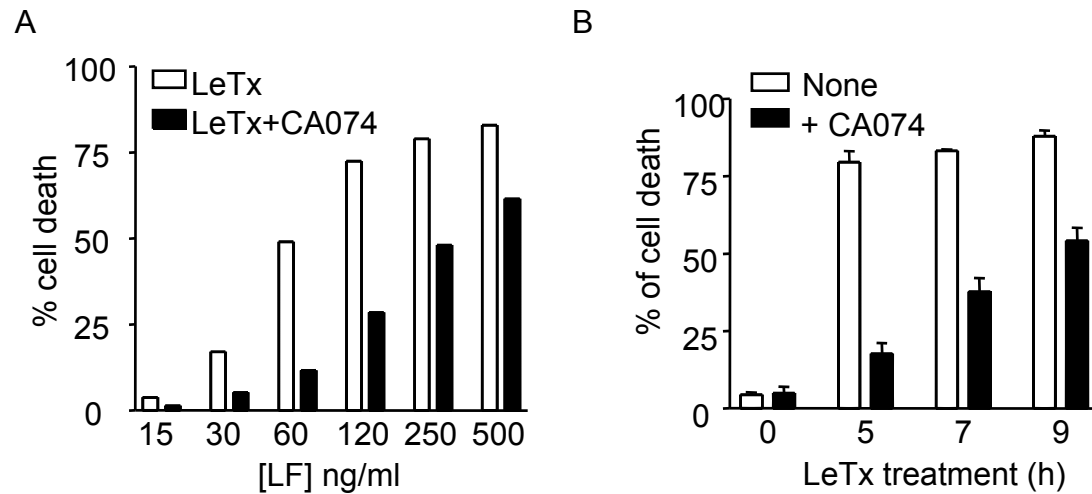

Supplementary Figure 1. The cathepsin B inhibitor CA074 prevents cell death induced by anthrax lethal toxin in a dose- and time-dependent manner in RAW 264.7 macrophages. A. Cells were incubated in the presence or absence of CA074-Me (100  $\mu$ M) for 1 hour and then treated with LeTx of indicated concentration for 7 hours. Data are expressed as mean  $\pm$  S.D. ( $n = 3$ ). B. Cells were pretreated with or without CA074-Me (100  $\mu$ M) and then treated with LeTx (250 ng/mL LF and 500 ng/mL PA) for the indicated time. MTT was added 2 hours before the indicated time point. Cell death assays were performed as in Materials and Methods. Data are expressed as mean  $\pm$  S.D. ( $n = 4$ ).

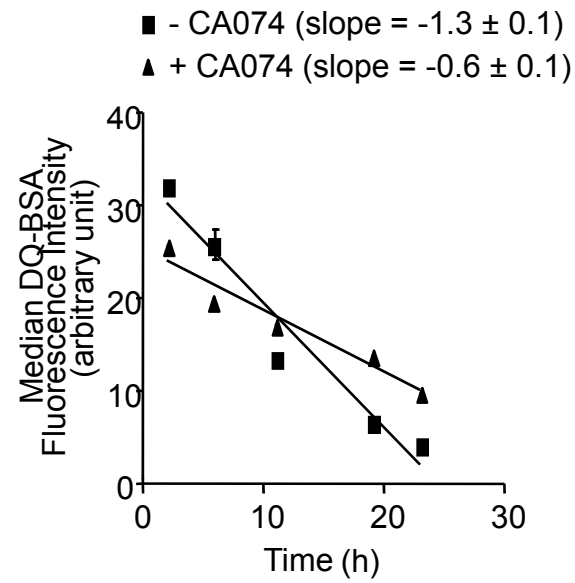

Supplementary Figure 2. Cathepsin B inhibition causes defective autophagy flux. THP-1 cells were incubated in RPMI media containing DQ-BSA (10  $\mu\text{g}/\text{mL}$ ) for 15 minutes at 37°C in 5% CO<sub>2</sub>. Cells were washed and incubated further in regular growth media for 45 minutes to insure that DQ-BSA had reached the lysosomal compartment. Cells were then further incubated in regular growth media in the presence or absence of CA074-Me (50  $\mu\text{M}$ ), then harvested at indicated time points. Cells were analyzed using flow cytometry. Median DQ-BSA fluorescent intensities of these populations were calculated using FlowJo. The median DQ-BSA intensities of controls were subtracted from these values, and the resulting differences were plotted as a scatter graph.
